# Supplementary material
Source: PubMed Central journal article supplement (PMC7494210)
Supplement: NIHMS1623463-supplement-Supplemental_File.pdf [file NIHMS1623463-supplement-Supplemental_File.pdf]

## Supporting Information

### **Keratinocyte-specific Peptides-based Surfaces for Hemidesmosome Upregulation and Prevention of Bacterial Colonization**

*Nicholas G. Fischer, Dina G. Moussa, Erik P. Skoe, David A. De Jong, and Conrado Aparicio\**

A)

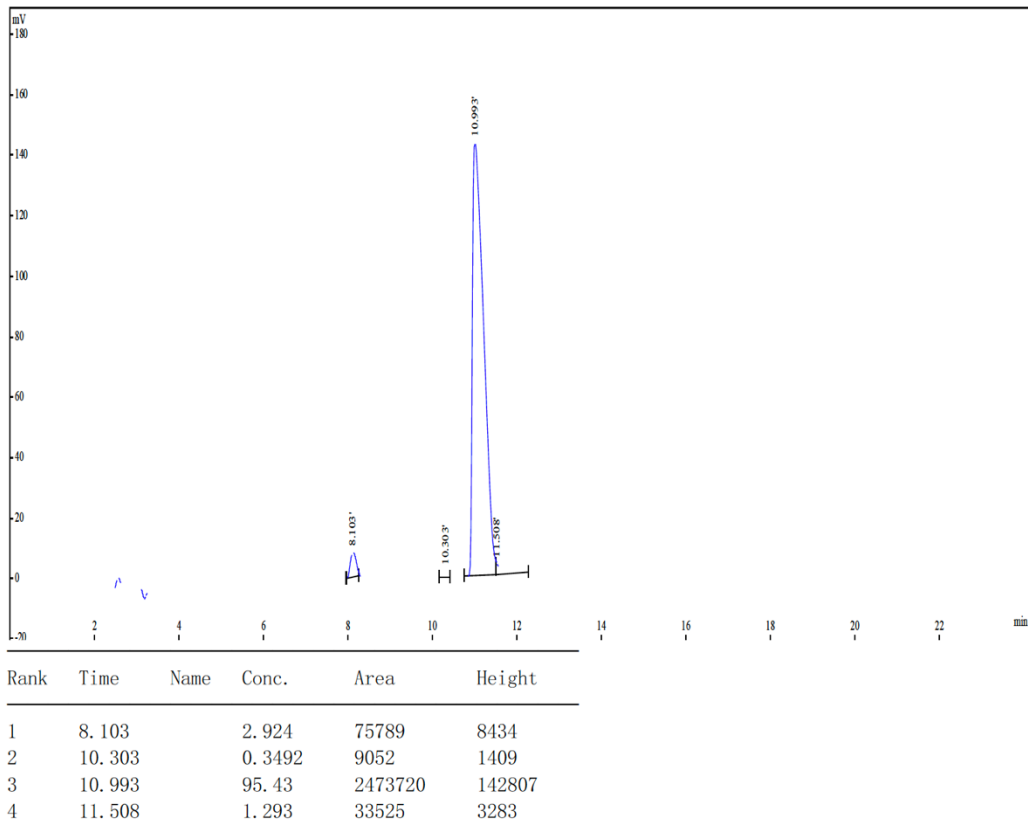

B)

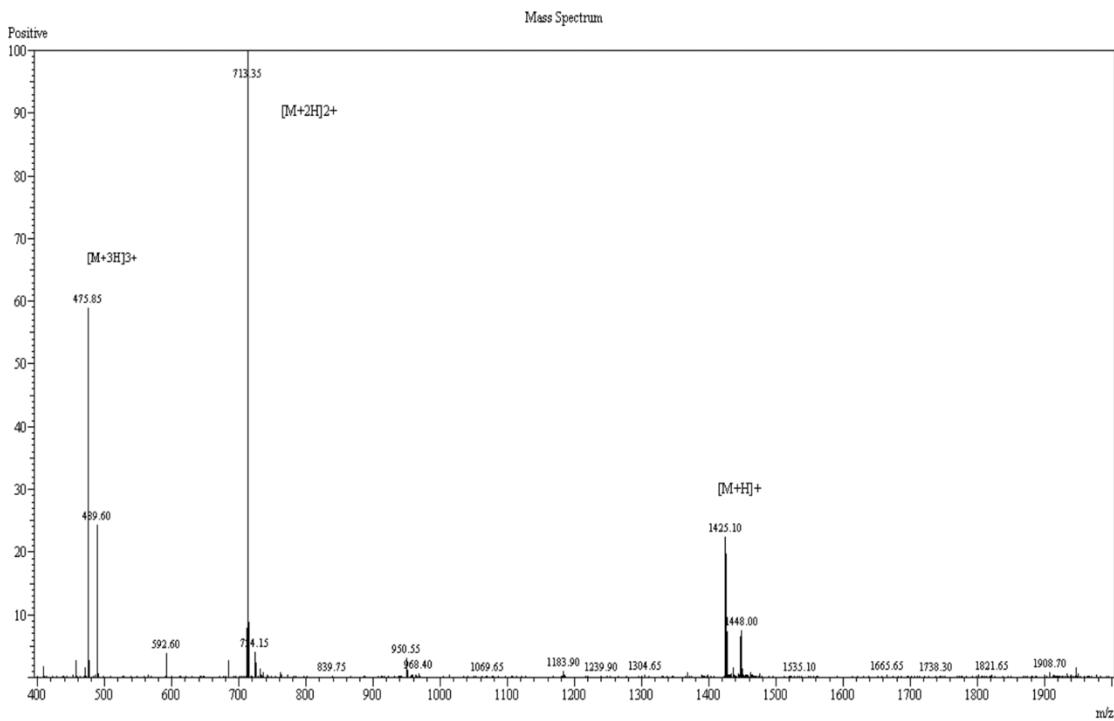

**Figure S1.** A) HPLC analysis and B) mass spectroscopy spectrum of the designer peptide GL13K (MW=1424.80 Da).

A)

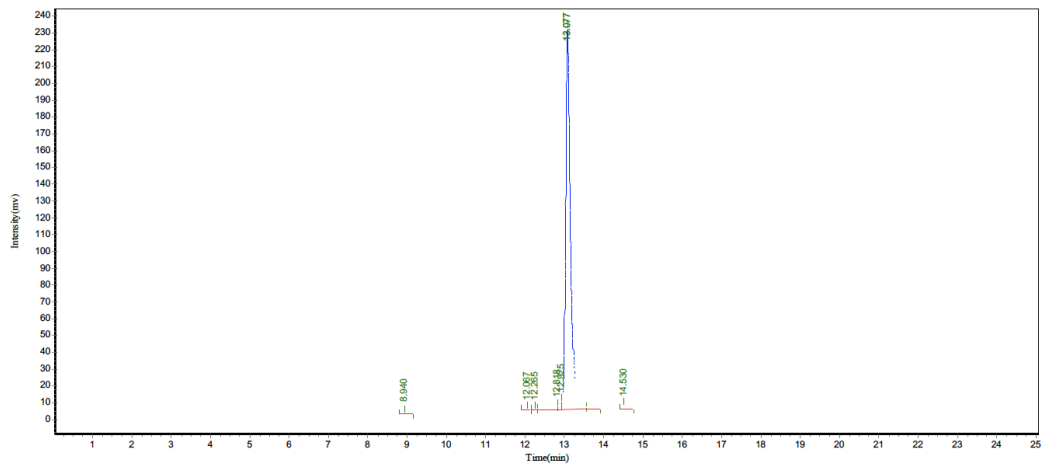

| Peak No. | Ret Time | Height     | Area        | Conc..  |
|----------|----------|------------|-------------|---------|
| 1        | 8.940    | 719.368    | 7594.694    | 0.3654  |
| 2        | 12.067   | 535.302    | 4653.564    | 0.2239  |
| 3        | 12.265   | 804.669    | 6442.935    | 0.3100  |
| 4        | 12.818   | 1873.035   | 35780.254   | 1.7215  |
| 5        | 12.925   | 4669.579   | 20455.770   | 0.9842  |
| 6        | 13.077   | 227150.359 | 1977026.000 | 95.1202 |
| 7        | 13.077   | 1061.417   | 9944.847    | 0.4785  |
| 8        | 14.530   | 1982.913   | 16551.395   | 0.7963  |

**B)**

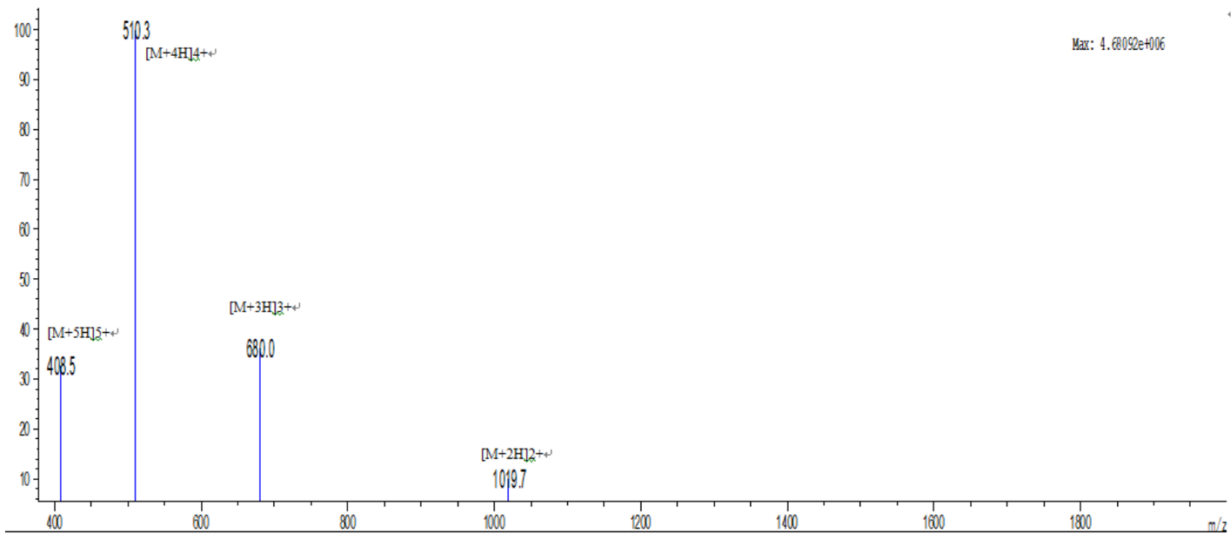

**Figure S2.** A) HPLC analysis and B) mass spectrometry spectrum of LamLG3 (MW=2037.49 Da).

A)

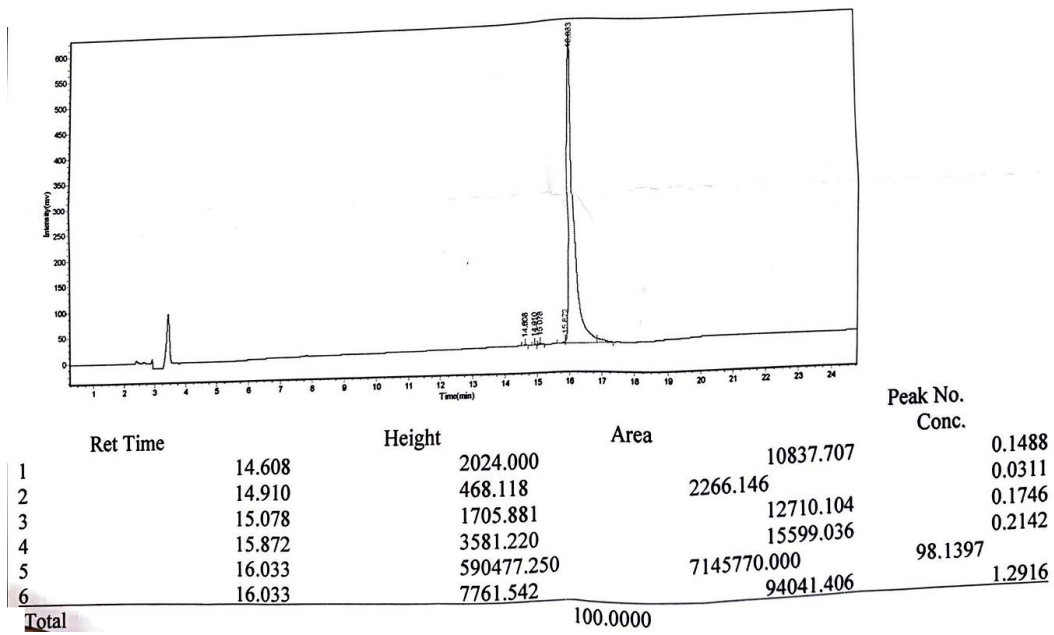

B)

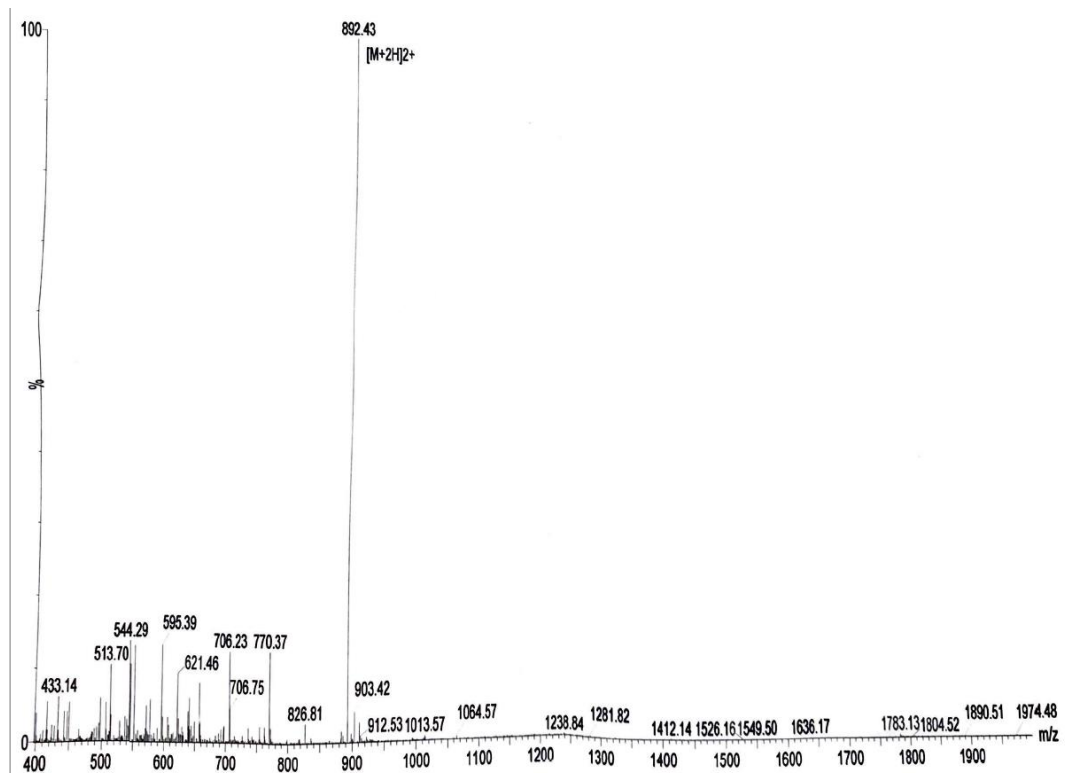

**Figure S3.** A) HPLC analysis and B) mass spectroscopy spectrum of GL13K-5,6-FAM (MW=1783.17 Da).

A)

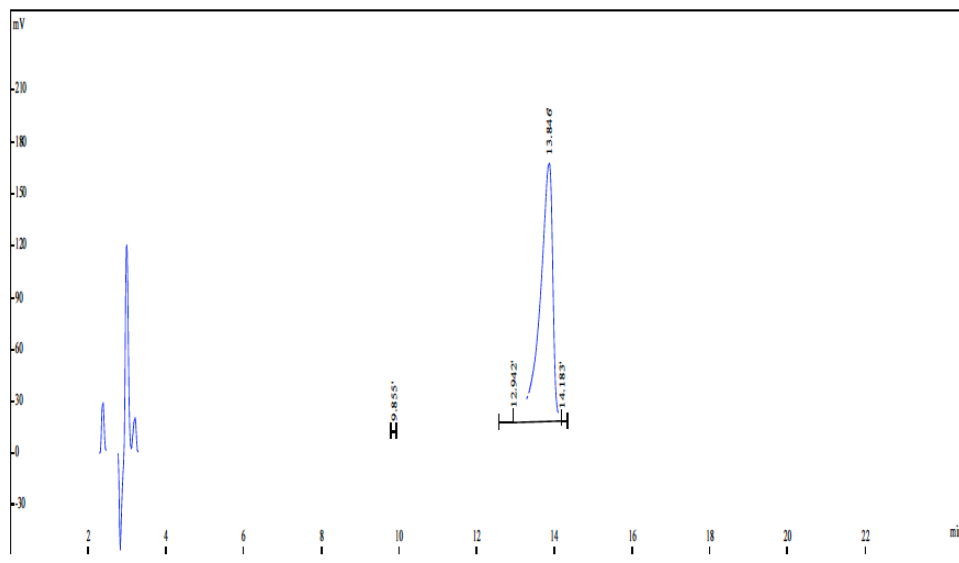

| Rank  | Time   | Conc.   | Area    | Height |
|-------|--------|---------|---------|--------|
| 1     | 9.855  | 0.1501  | 4979    | 1050   |
| 2     | 12.942 | 0.8922  | 29600   | 3364   |
| 3     | 13.846 | 98.6650 | 3273302 | 148753 |
| 4     | 14.183 | 0.2927  | 9712    | 1632   |
| Total |        | 100     | 3317593 | 154799 |

B)

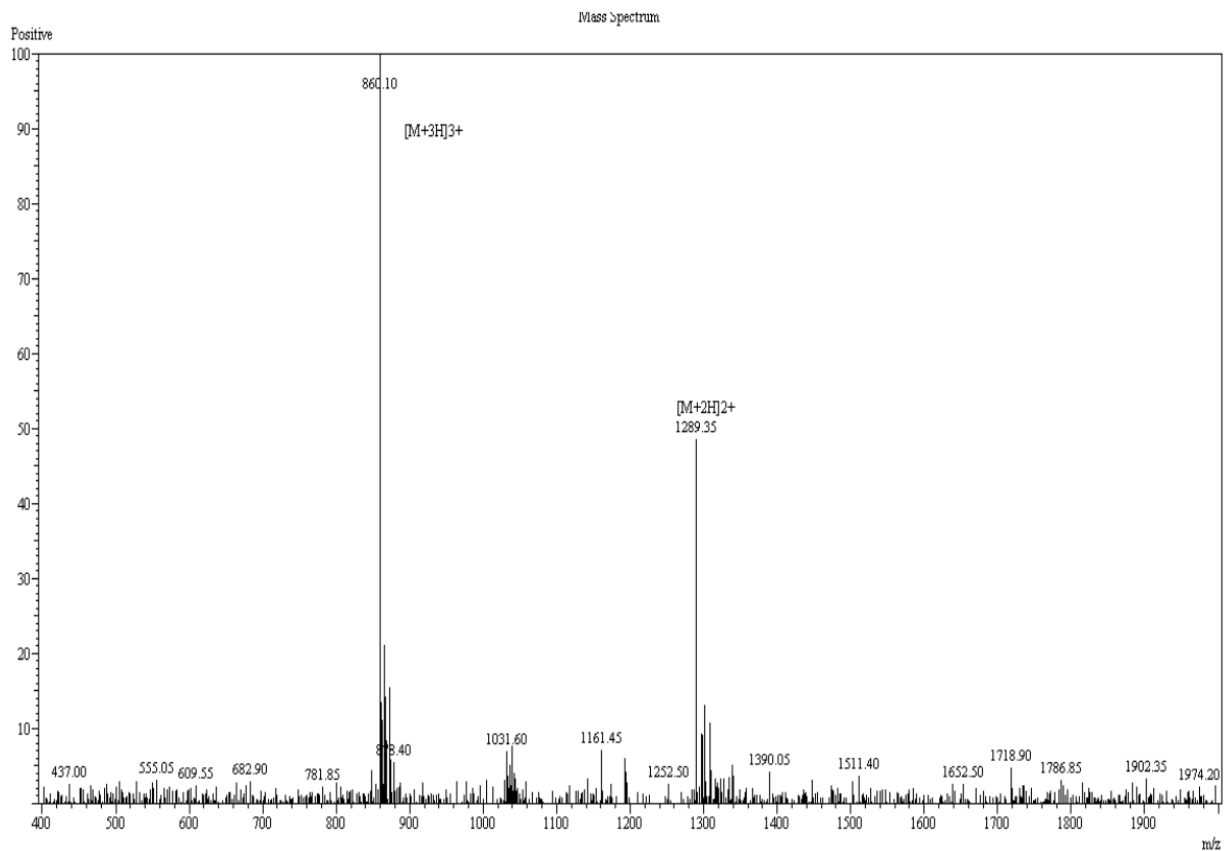

**Figure S4.** A) HPLC analysis and B) mass spectroscopy spectrum of LamLG3-TAMRA (MW=2578.10 Da)

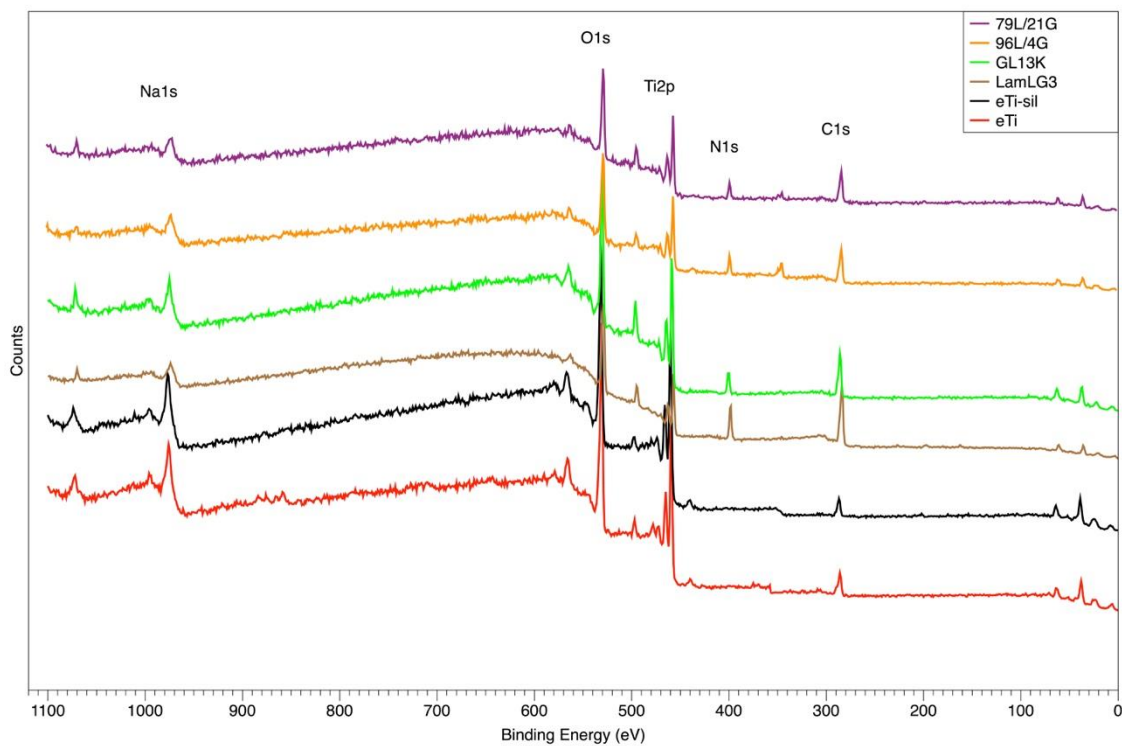

**Figure S5.** X-ray photoelectron spectroscopy (XPS) of coatings and controls before challenges.

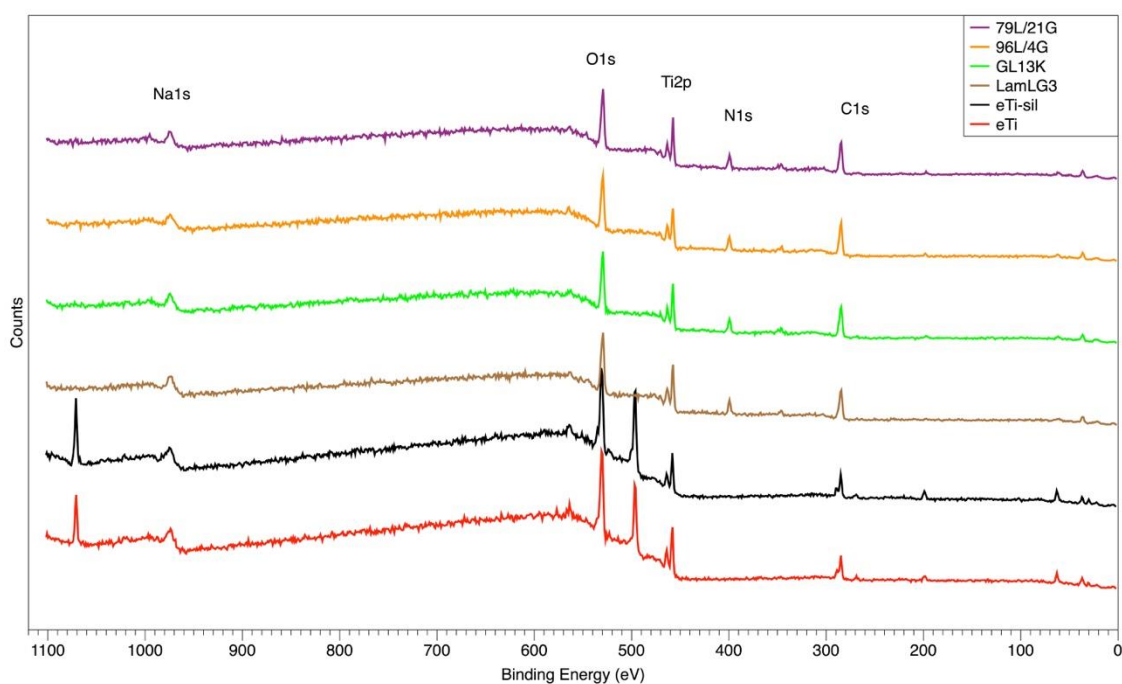

**Figure S6.** X-ray photoelectron spectroscopy (XPS) of coatings and controls after incubation at pH=4.5 (37°C; 1 week).

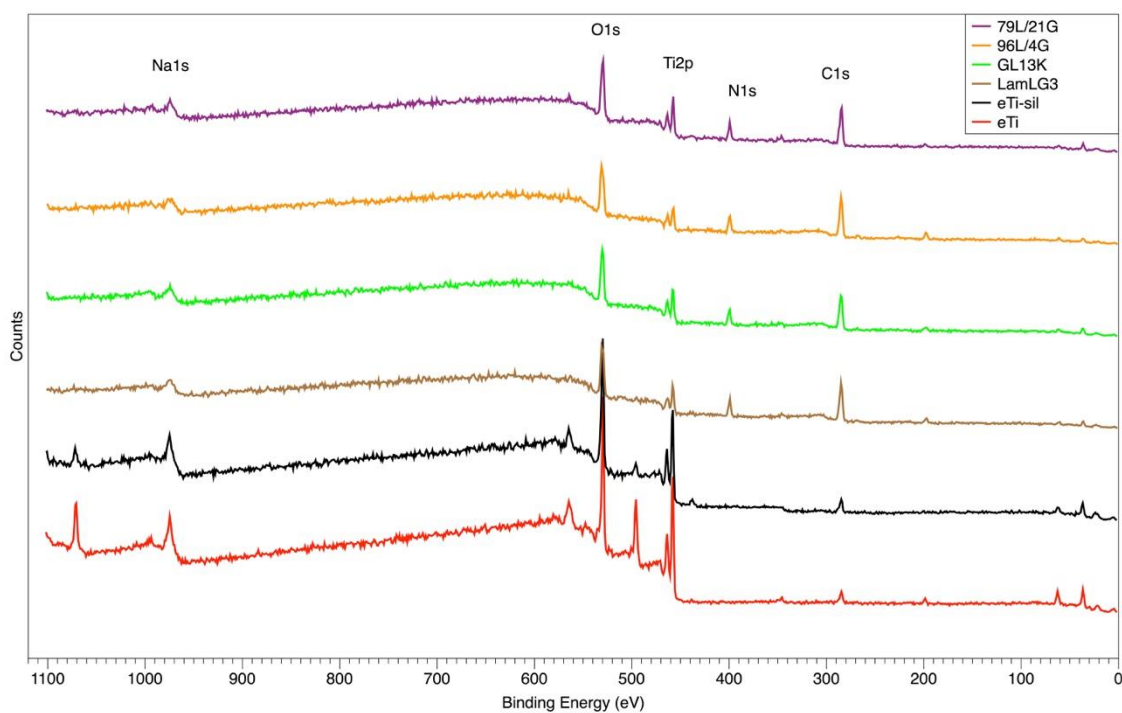

**Figure S7.** X-ray photoelectron spectroscopy (XPS) of coatings and controls after incubation at pH=7.4 (37°C; 1 week).

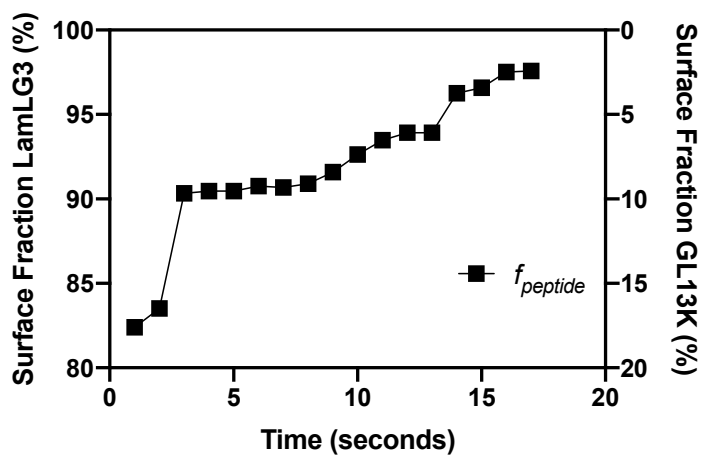

**Figure S8.** Surface fractional area of 96L/4G (one representative experiment) through time using dynamic water contact angle and eqn. 1 (main text) as the surface fractional area (based on contact angles) approaches approximately 96L/4G once the droplet establishes equilibrium at approximately 15 seconds.

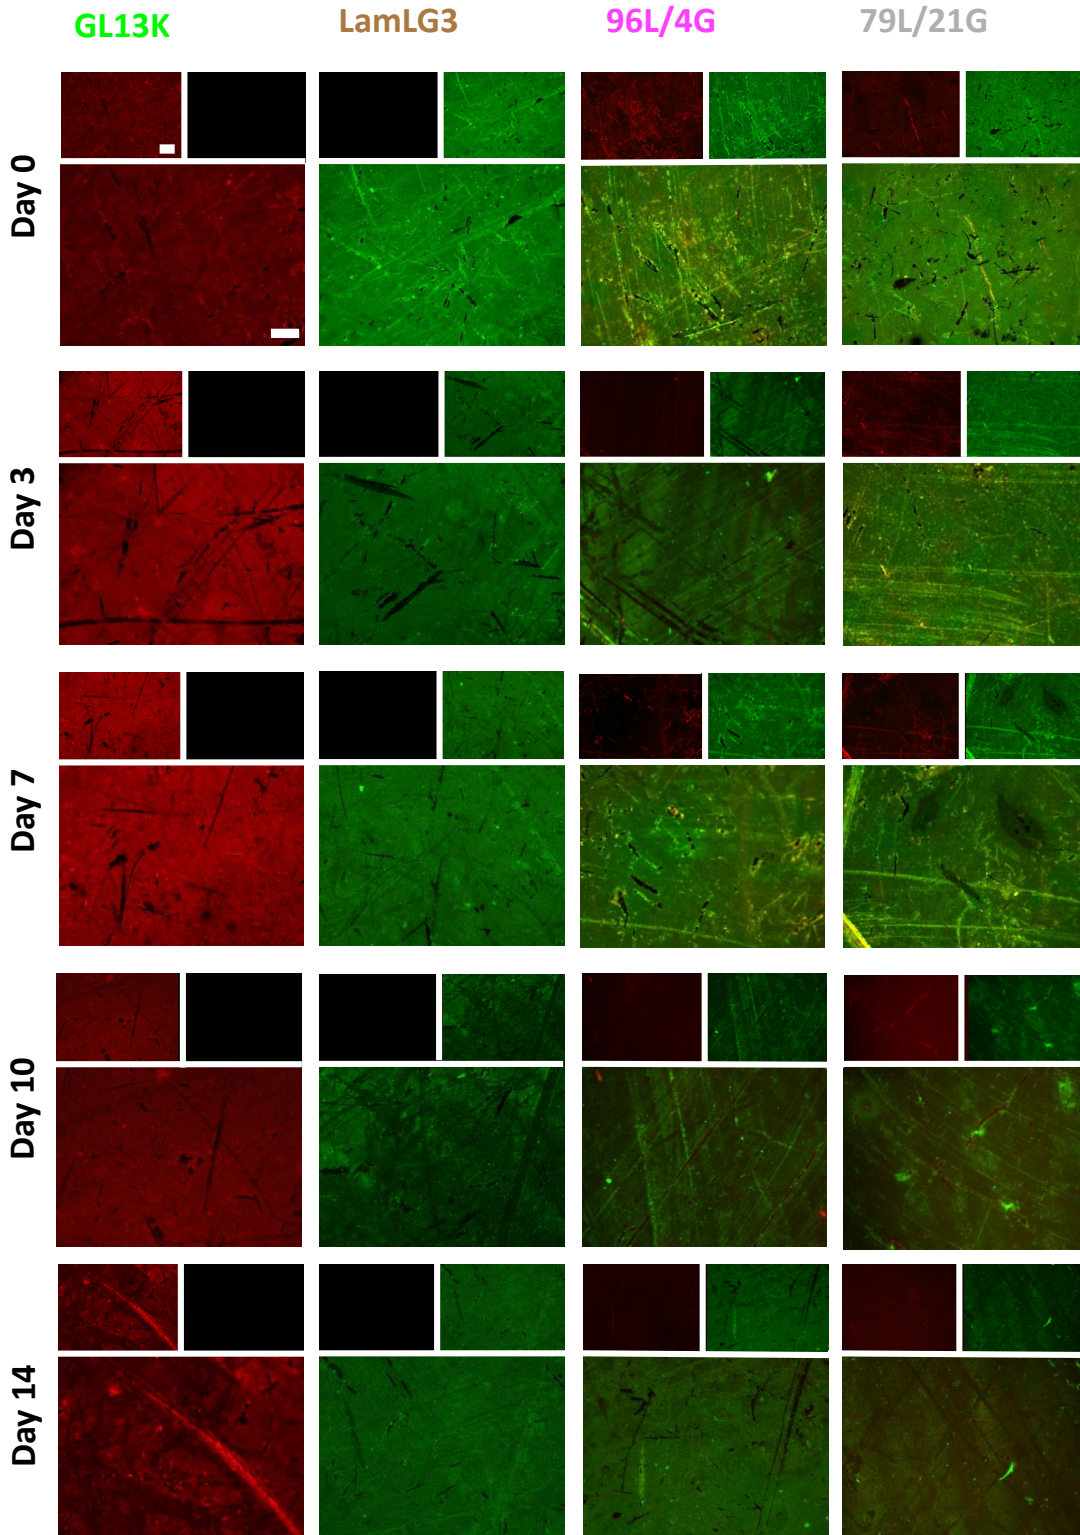

**GL13K Channel** **LamLG3 Channel**

**Figure S9.** Visualization of fluorescently-tagged peptides after incubation (37°C) in saliva through 14 days [GL13K-red (to emphasize antimicrobial activity) and LamLG3-green]. Each channel (red and green, small frames at top) and the merged channel (large frame at bottom) are presented. Scale bar is 100 µm.



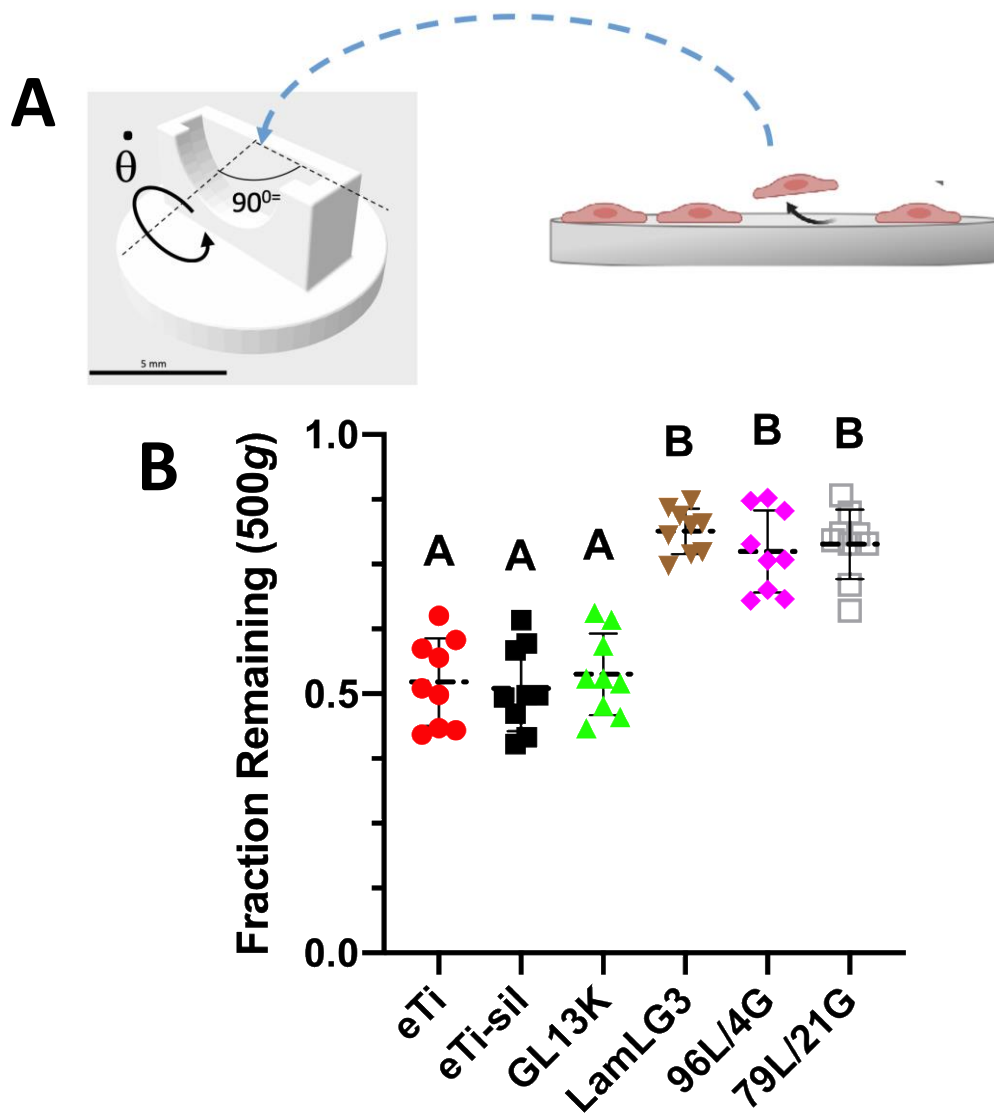

**Figure S10.** Experimental schematic of centrifugation experiment. A) Custom, 3D-printed holder for centrifugation experiment and centrifugation axis of rotation. B) Fraction remaining of keratinocytes on coatings after 500g centrifugation. Scale bar is 5 mm. A  $p$ -value of  $<0.05$  was considered statistically significant.

## Tables

**Table S1.** Quantification of elemental composition (atomic %) of coatings and controls before challenges. Values are sample mean  $\pm$  standard deviation.

| Composition [atomic %] | C1s          | N1s          | O1s          | Na1s        | Ti2p         | N/Ti | C/Ti |
|------------------------|--------------|--------------|--------------|-------------|--------------|------|------|
| eTi                    | 10.1 $\pm$ 2 | 0.0 $\pm$ 0  | 63.4 $\pm$ 1 | 1.5 $\pm$ 0 | 25 $\pm$ 3   | 0.0  | 0.4  |
| eTi-sil                | 16.2 $\pm$ 3 | 0.2 $\pm$ 0  | 55.3 $\pm$ 3 | 8.8 $\pm$ 2 | 19.5 $\pm$ 1 | 0.0  | 0.8  |
| GL13K                  | 39.1 $\pm$ 6 | 9.0 $\pm$ 1  | 36.9 $\pm$ 5 | 4.0 $\pm$ 1 | 11.0 $\pm$ 1 | 0.8  | 3.6  |
| LamLG3                 | 51.3 $\pm$ 1 | 13.2 $\pm$ 1 | 26.1 $\pm$ 3 | 4.3 $\pm$ 1 | 5.2 $\pm$ 1  | 2.5  | 9.9  |
| 96L/4G                 | 37.6 $\pm$ 2 | 8.5 $\pm$ 1  | 36.9 $\pm$ 4 | 2.0 $\pm$ 0 | 15.0 $\pm$ 2 | 0.6  | 2.5  |
| 79L/21G                | 38.6 $\pm$ 3 | 9.5 $\pm$ 1  | 39.0 $\pm$ 2 | 1.8 $\pm$ 1 | 11.1 $\pm$ 1 | 0.9  | 3.5  |

**Table S2.** Quantification of elemental composition (atomic %) of coatings and controls after incubation at pH=4.5 (37°C). Values are sample mean  $\pm$  standard deviation.

| Composition [atomic %] | C1s          | N1s          | O1s          | Na1s        | Ti2p         | N/Ti | C/Ti |
|------------------------|--------------|--------------|--------------|-------------|--------------|------|------|
| eTi                    | 26.8 $\pm$ 7 | 0.6 $\pm$ 0  | 57.1 $\pm$ 4 | 2.4 $\pm$ 1 | 13.0 $\pm$ 9 | 0.0  | 2.1  |
| eTi-sil                | 17.4 $\pm$ 1 | 0.6 $\pm$ 0  | 59.4 $\pm$ 2 | 3.2 $\pm$ 1 | 19.4 $\pm$ 2 | 0.0  | 0.9  |
| GL13K                  | 48.3 $\pm$ 1 | 12.2 $\pm$ 3 | 29.4 $\pm$ 6 | 1.3 $\pm$ 1 | 8.8 $\pm$ 4  | 1.4  | 5.5  |
| LamLG3                 | 47.5 $\pm$ 1 | 10.7 $\pm$ 1 | 32.4 $\pm$ 1 | 1.1 $\pm$ 1 | 8.3 $\pm$ 1  | 1.3  | 5.7  |
| 96L/4G                 | 46.1 $\pm$ 4 | 11.7 $\pm$ 1 | 32.5 $\pm$ 2 | 0.5 $\pm$ 1 | 9.1 $\pm$ 2  | 1.3  | 5.1  |
| 79L/21G                | 46.3 $\pm$ 2 | 11.1 $\pm$ 2 | 33.4 $\pm$ 2 | 0.5 $\pm$ 1 | 8.6 $\pm$ 1  | 1.3  | 5.4  |

**Table S3.** Quantification of elemental composition (atomic %) of coatings and controls after incubation at pH=7.4 (37°C). Values are sample mean  $\pm$  standard deviation.

| Composition [atomic %] | C1s          | N1s          | O1s          | Na1s        | Ti2p         | N/Ti | C/Ti |
|------------------------|--------------|--------------|--------------|-------------|--------------|------|------|
| eTi                    | 12.7 $\pm$ 1 | 0.5 $\pm$ 1  | 60.9 $\pm$ 4 | 2.0 $\pm$ 1 | 23.9 $\pm$ 1 | 0.0  | 0.5  |
| eTi-sil                | 17.2 $\pm$ 3 | 0.4 $\pm$ 0  | 59.9 $\pm$ 3 | 2.4 $\pm$ 1 | 20.1 $\pm$ 4 | 0.0  | 0.9  |
| GL13K                  | 49.7 $\pm$ 4 | 10.7 $\pm$ 2 | 31.2 $\pm$ 3 | 1.5 $\pm$ 1 | 7.0 $\pm$ 2  | 1.5  | 7.1  |
| LamLG3                 | 44.6 $\pm$ 2 | 12.2 $\pm$ 1 | 32.0 $\pm$ 2 | 1.6 $\pm$ 1 | 9.7 $\pm$ 1  | 1.3  | 4.6  |
| 96L/4G                 | 50.1 $\pm$ 5 | 12.4 $\pm$ 2 | 29.7 $\pm$ 1 | 1.0 $\pm$ 1 | 6.9 $\pm$ 2  | 1.8  | 7.2  |
| 79L/21G                | 51.0 $\pm$ 2 | 10.6 $\pm$ 1 | 34.3 $\pm$ 4 | 0.6 $\pm$ 1 | 3.5 $\pm$ 4  | 3.1  | 14.8 |
